# Supplementary material for: Protocol for hospital based-surveillance of cerebral palsy (CP) in Hanoi using the Paediatric Active Enhanced Disease Surveillance mechanism (PAEDS-Vietnam): a study towards developing hospital-based disease surveillance in Vietnam
Source: PubMed Central journal article supplement — BMJ Open. 2017 Nov 9;7(11):e017742. doi: 10.1136/bmjopen-2017-017742 (PMC5695473; doi:10.1136/bmjopen-2017-017742), 2017-11-09
Supplement: bmjopen-2017-017742.draft_revisions.pdf [file bmjopen-2017-017742.draft_revisions.pdf]

# BMJ Open

BMJ Open is committed to open peer review. As part of this commitment we make the peer review history of every article we publish publicly available.

When an article is published we post the peer reviewers' comments and the authors' responses online. We also post the versions of the paper that were used during peer review. These are the versions that the peer review comments apply to.

The versions of the paper that follow are the versions that were submitted during the peer review process. They are not the versions of record or the final published versions. They should not be cited or distributed as the published version of this manuscript.

BMJ Open is an open access journal and the full, final, typeset and author-corrected version of record of the manuscript is available on our site with no access controls, subscription charges or pay-per-view fees (<http://bmjopen.bmj.com>).

If you have any questions on BMJ Open's open peer review process please email [editorial.bmjopen@bmj.com](mailto:editorial.bmjopen@bmj.com)

# BMJ Open

## Hospital based-surveillance of cerebral palsy (CP) in Hanoi using the Paediatric Active Enhanced Disease Surveillance Mechanism (PAEDS-Vietnam): a study towards developing national hospital based disease surveillance in Vietnam

|                                 |                                                                                                                                                                                                                                                                                                                                                                                                                                                                                                                                                                                                                                                                                         |
|---------------------------------|-----------------------------------------------------------------------------------------------------------------------------------------------------------------------------------------------------------------------------------------------------------------------------------------------------------------------------------------------------------------------------------------------------------------------------------------------------------------------------------------------------------------------------------------------------------------------------------------------------------------------------------------------------------------------------------------|
| Journal:                        | <i>BMJ Open</i>                                                                                                                                                                                                                                                                                                                                                                                                                                                                                                                                                                                                                                                                         |
| Manuscript ID                   | bmjopen-2017-017742                                                                                                                                                                                                                                                                                                                                                                                                                                                                                                                                                                                                                                                                     |
| Article Type:                   | Protocol                                                                                                                                                                                                                                                                                                                                                                                                                                                                                                                                                                                                                                                                                |
| Date Submitted by the Author:   | 22-May-2017                                                                                                                                                                                                                                                                                                                                                                                                                                                                                                                                                                                                                                                                             |
| Complete List of Authors:       | Khandaker, Gulam; National Centre for Immunisation Research and Surveillance of Vaccine Preventable Diseases, Van Bang, Nguyen; Hanoi Medical University, Paediatrics<br>Dũng, Trĩnh ; National Children's Hospital, Rehabilitation<br>Giang, Nguyen ; National Children's Hospital, Rehabilitation<br>Chau, Cao ; Hanoi Medical University, Rehabilitation<br>Van Anh, Nguyen ; Hanoi Medical University, Medical Education and Skills-Lab<br>Van Thuong, Nguyen ; St Paul Hanoi Municipal Hospital, Paediatrics<br>Badawi, Nadia; Children's Hosital at Westmead, Neonatology<br>Elliott, Elizabeth; University of Sydney, Sydney Medical School; Sydney Children's Hospital Network, |
| <b>Primary Subject Heading</b>: | Paediatrics                                                                                                                                                                                                                                                                                                                                                                                                                                                                                                                                                                                                                                                                             |
| Secondary Subject Heading:      | Epidemiology, Public health, Rehabilitation medicine                                                                                                                                                                                                                                                                                                                                                                                                                                                                                                                                                                                                                                    |
| Keywords:                       | Cerebral palsy, Childhood disability, Surveillance, Hanoi, Vietnam                                                                                                                                                                                                                                                                                                                                                                                                                                                                                                                                                                                                                      |
|                                 |                                                                                                                                                                                                                                                                                                                                                                                                                                                                                                                                                                                                                                                                                         |

SCHOLARONE™  
Manuscripts

1  
2  
3 **Hospital based-surveillance of cerebral palsy (CP) in Hanoi using the Paediatric Active**  
4 **Enhanced Disease Surveillance Mechanism (PAEDS-Vietnam): a study towards**  
5 **developing national hospital based disease surveillance in Vietnam**  
6  
7  
8  
9

10  
11 **Dr Gulam Khandaker, PhD<sup>†</sup>**  
12

13 The Children's Hospital at Westmead (Clinical School), The University of Sydney, Locked  
14 Bag 4001, Westmead, NSW 2145, Australia  
15

16 Email: [gulam.khandaker@health.nsw.gov.au](mailto:gulam.khandaker@health.nsw.gov.au)  
17

18  
19  
20 **A/Prof Nguyen Van Bang, PhD<sup>†</sup>**  
21

22 Department of Paediatrics, Hanoi Medical University, Hanoi, Vietnam  
23

24 Email: [bsbangbmnhiyhn@gmail.com](mailto:bsbangbmnhiyhn@gmail.com)  
25  
26

27  
28 **Dr Trịnh Quang Dũng, PhD**  
29

30 Head of Rehabilitation Department, National Children's Hospital, Hanoi, Vietnam  
31

32 Email: [quangdzungnip@gmail.com](mailto:quangdzungnip@gmail.com)  
33  
34

35 **Dr Nguyen Thi Huong Giang, PhD**  
36

37 Deputy Head of Rehabilitation Department, National Children's Hospital, Hanoi, Vietnam  
38

39 Email: [hgiang70@gmail.com](mailto:hgiang70@gmail.com)  
40  
41

42 **Prof Cao Minh Chau, PhD**  
43

44 Rehabilitation Department, Hanoi Medical University (Bach Mai hospital), Hanoi, Vietnam  
45

46 Email: [caominhchaubm@yahoo.com](mailto:caominhchaubm@yahoo.com)  
47  
48

49 **Dr Nguyen Thi Van Anh, MD**  
50

51 Medical Education and Skills-Lab Department, Hanoi Medical School, Hanoi, Vietnam  
52

53 Email: [vananh299@gmail.com](mailto:vananh299@gmail.com)  
54  
55  
56  
57  
58  
59  
60

1  
2  
3 **Dr Nguyen Van Thuong, MD**  
4

5 Head of Pediatric Dept, Vice-Director of St Paul Hanoi Municipal Hospital, Hanoi, Vietnam  
6

7  
8 Email: [thuongnhixanhpon@gmail.com](mailto:thuongnhixanhpon@gmail.com)  
9

10 **Prof Nadia Badawi, PhD**  
11

12 Cerebral Palsy Alliance Research Institute and the Children's Hospital at Westmead,  
13 Australia  
14

15  
16  
17 Email: [nadia.badawi@health.nsw.gov.au](mailto:nadia.badawi@health.nsw.gov.au)  
18

19 **Prof Elizabeth Elliott, MD**  
20

21 Discipline of Paediatrics and Child Health, The Children's Hospital at Westmead Clinical  
22 School, Sydney Medical School, The University of Sydney, NSW, Australia  
23  
24

25  
26 Email: [Elizabeth.elliott@health.nsw.gov.au](mailto:Elizabeth.elliott@health.nsw.gov.au)  
27

28  
29  
30  
31 †joint first author  
32

33  
34  
35  
36  
37  
38 **Corresponding author: Dr Gulam Khandaker**  
39

40 The Children's Hospital at Westmead (Clinical School), The University of Sydney,  
41

42  
43 Locked Bag 4001, Westmead, NSW 2145, Australia  
44

45  
46 Email: [gulam.khandaker@health.nsw.gov.au](mailto:gulam.khandaker@health.nsw.gov.au)  
47

48  
49 T: 61 2 9845 3061  
50  
51  
52  
53  
54  
55  
56  
57  
58  
59  
60

**Abstract for protocol (299 words)**

**Introduction:** The epidemiology, pathogenesis, management and outcomes of cerebral palsy (CP) in low- and middle-income countries (LMIC) including Vietnam are unknown because of the lack of mechanisms for standardised collection of data. In this paper, we outline the protocol for developing a hospital-based surveillance system modelled on the Paediatric Active Enhanced Disease Surveillance system in Australia (PAEDS). Using PAEDS-Vietnam we will define the aetiology, motor function and its severity, associated impairments, nutritional, and rehabilitation status of children with CP in Hanoi, Vietnam. These essential baseline data will inform future health service planning, health professional education and training and family support.

**Methods and Analysis:** This is a hospital-based prospective surveillance of children with CP presenting to the rehabilitation, neurology and general paediatric services at the National Children's Hospital and St Paul's Hospital in Hanoi. We will use active, prospective daily case-finding for all children with CP aged <18 years who are hospitalised or present to outpatients departments. Following parental consent, data will be collected using a modified version of the Australian Cerebral Palsy Register questionnaire. The data collection form has been developed in consultation with local and international experts and translated into Vietnamese. Information collected will include demographics, maternal health and birth history, type and severity of CP, known risk factors for CP and nutrition, immunisation, education and rehabilitation status.

**Ethics and Dissemination:** This study was approved by the Hanoi Medical University Institutional Review Board (HMU IRB decision no. 1722) and the University of Sydney Human Research Ethics Committee (approval no. 2016/456). Establishment of PAEDS-Vietnam will enable hospital-based surveillance of CP for the first time in Vietnam. The data collected will enable estimates of the burden of CP in these Hanoi hospitals. It will identify preventable causes of CP, patient needs and service gaps and facilitate early diagnosis and intervention.

**Keywords:** Cerebral palsy, Childhood disability, Surveillance, Hanoi, Vietnam

**Word count:** 1876 words, 1 Table and 17 references

## INTRODUCTION

Cerebral Palsy (CP) is the major global cause of childhood disability. Based on data from high income countries it affects up to 17 million people with a prevalence of approximately 2 per 1,000 live births.<sup>1</sup> The prevalence of CP in LMIC is believed to be four to six times higher however few reliable data are available.<sup>2</sup> In Vietnam there estimated to be 500,000 people living with CP, where CP comprises 30-40% of all childhood disability.<sup>3,4</sup>

The prevalence of CP likely varies between provinces in Vietnam. For example, CP prevalence was 0.6 per 1,000 in the general population in Khanh Hoa and 1.5 per 1,000 in the general population in Hatay.<sup>5</sup> These data are limited by methodological quality, including small sample sizes, and likely underestimate CP prevalence. In one treatment centre in Vietnam an increase in the number of cases with CP has been documented over time. In 1998 at that centre 394 (25.7%) of all children admitted had CP. This increased by more than three times to 912 (47.3%) of all admissions in 2002.<sup>5</sup> In Vietnam, the proportion of children with CP who receive rehabilitation services is estimated at between 30% and 74%, however this cannot be accurately determined without good epidemiological data.<sup>5</sup>

The Vietnamese Ministry of Health has recently recognised service delivery for CP as a public health priority.<sup>3</sup> Furthermore, a recent health reform in Vietnam has established universal health coverage which will provide free-of-charge treatment for children with CP who are aged 6 years or less. Children over 6 years of age who attend school are only covered by voluntary health insurance, requiring guardians to purchase treatment based on their ability to pay.<sup>6</sup> There are no Vietnamese data indicating the age of diagnosis of CP nor the proportion of children who attend mainstream school. In a recent study from Bangladesh found that the mean age of diagnosis of CP is 4.9 years and only 16% of children with CP attend mainstream school, the remainder having no access to education (preliminary results from the Bangladesh CP Register study).<sup>7</sup>

Treatment of CP in Vietnam is commonly reported to be a combination of traditional and modern medicine. Traditional medicine includes massage, reflexology, use of electrical or water magnets and stimulated ventilation with an electric current.<sup>4</sup> Alternatively, a holistic treatment approach provided following establishment of a centre for social assistance for disadvantaged children was effective in improving quality of movement through physiotherapy in 92% of children and providing special/inclusive education.<sup>8</sup>

1  
2  
3 In Vietnam there is an urgent need to understand the burden of CP, patient needs and service  
4 gaps, however there is no disease surveillance, there are no universally accepted treatment  
5 guidelines, and there is no information on the uptake of evidence-based diagnostics,  
6 treatments and policy planning. The lack of rigorous epidemiological data limits capacity to  
7 plan for future disability services.  
8  
9

10  
11 We aim to develop a hospital-based surveillance system modelled on the Paediatric Active  
12 Enhanced Disease Surveillance system operating in Australia (PAEDS). Using PAEDS-  
13 Vietnam we will define the aetiology, motor function, severity, associated impairments, and  
14 nutritional and rehabilitation status of children with CP in Hanoi, Vietnam. Collection of  
15 these essential baseline data will inform future health service planning, and need for health  
16 professional training and family support. Our experience will enable us to extend the  
17 surveillance to national level.  
18  
19  
20  
21  
22  
23

## 24 25 26 27 **METHODS AND ANALYSIS**

### 28 29 **Aims and Objectives**

30  
31 The overall aim of this study is to i) implement a hospital-based surveillance system to  
32 identify children presenting with CP in Hanoi that is modelled on PAEDS; ii) collect baseline  
33 information on the known risk factors, clinical presentation (motor function/severity,  
34 associated impairments, nutritional and rehabilitation status), service use and needs of  
35 children with CP in Hanoi, Vietnam; and iii) assess the feasibility of a national hospital based  
36 paediatric disease surveillance mechanism for Vietnam.  
37  
38  
39  
40  
41

42 Our specific objectives are to identify and characterise children with CP presenting to the  
43 National Children's Hospital (NCH) and St Paul's Hospitals in Hanoi, Vietnam in order to:  
44  
45

- 46 1. Estimate the burden of CP in the two hospitals
- 47 2. Define the aetiology of CP
- 48 3. Document the motor impairment and severity of CP using the Gross Motor Function  
49 Classification System (GMFC) and the Manual Ability Classification System (MACS)
- 50 4. Describe associated impairments in children with CP
- 51
- 52
- 53
- 54
- 55
- 56
- 57
- 58
- 59
- 60

- 1
- 2
- 3 5. Assess the nutritional status of children with CP
- 4
- 5 6. Assess the rehabilitation status of children with CP
- 6
- 7
- 8 7. Evaluate the strengths and limitations of a hospital based disease surveillance mechanism
- 9

### 10 **Overview of study design**

11 This is a hospital based, prospective cohort study among children with CP who attend the  
12 Rehabilitation, Neurology, and General Paediatric services (inpatient and outpatient) at the  
13 NCH and St Paul's Hospital in Hanoi, Vietnam.  
14  
15

### 16 **Description of the participating hospitals**

17 NCH is a 1,200 bed tertiary paediatric hospital that provides services for nearly 40,000 in-  
18 patients and 350,000 out-patients each year from northern Vietnam. St Paul's Hospital is a  
19 general medical facility with 150 paediatric beds. Both hospitals are located in central part of  
20 Hanoi - the capital of Vietnam.  
21  
22

### 23 **Surveillance method/activities**

24 We will establish a method for active, hospital-based surveillance to identify children with  
25 CP attending the two hospitals (i.e. PAEDS-Vietnam). This system will be based on the  
26 highly successful, government funded Paediatric Active Enhanced Disease Surveillance  
27 (PAEDS) System in Australian, established by the Australian Paediatric Surveillance Unit  
28 (APSU) in collaboration with the National Centre for Immunisation Research and  
29 Surveillance of Vaccine Preventable Diseases (NCIRS) in 2007.<sup>9</sup> PAEDS is currently active  
30 in five Australian States and collects data on six conditions (i.e. acute flaccid paralysis,  
31 intussusception, varicella and herpes zoster, pertussis, febrile seizures and acute childhood  
32 encephalitis). Clinicians are appointed specifically to identify new admissions or  
33 presentations with the condition of interest on a daily basis. This is achieved by daily contact  
34 with key collaborators (e.g. directors of the rehabilitation ward) and review of hospital intake  
35 data (e.g. ward admissions). This process allows for the timely collection of clinical and  
36 laboratory data on hospitalised children and has proven invaluable for monitoring selected  
37 conditions of national interest (e.g. varicella requiring hospitalisation)<sup>10</sup> and responding to  
38 epidemiological emergencies (e.g. the 2009 influenza pandemic).<sup>11,12</sup>  
39  
40  
41  
42  
43  
44  
45  
46  
47  
48  
49  
50  
51  
52  
53  
54  
55  
56  
57  
58  
59  
60

### Study participants

All children aged less than 18 years with CP attending as an inpatient or outpatient to one of the participating hospitals during the study period.

### Case definition

We have adopted the approach used by Surveillance of Cerebral Palsy in Europe (SCPE) and the Australian Cerebral Palsy Register (ACPR)<sup>13,14</sup> which allows use of any definition that includes the following five key elements.<sup>15,16,17</sup>

Cerebral palsy:

- (1) is an umbrella term for a group of disorders
- (2) is a condition that is permanent but not unchanging
- (3) involves a disorder of movement and/or posture and of motor function
- (4) is due to a non-progressive interference, lesion, or abnormality, and
- (5) the interference, lesion, or abnormality originates in the immature brain.

### Inclusion/exclusion criteria

A 'case' must fulfil the criteria contained in the five definitional elements above. In children aged <5 years with a diagnosis of 'CP, the diagnosis must be confirmed when the child reaches 5 years of age. If new information becomes available for a child participating in the study their entry may be updated, which may involve inclusion or exclusion.<sup>14</sup>

### Consent

Informed consent for inclusion in the study will be obtained from the parent/guardian of children with CP following a clear explanation of the study.

### Case ascertainment

Before commencing surveillance we will provide, and train clinicians to use, internationally recognised diagnostic guidelines. Clinicians at each site will identify eligible children on a daily basis (active case ascertainment). Clinical data relevant to the study protocol will be recorded on a data collection form. We will train medical officers (paediatric doctors or

1  
2  
3 trainees) to identify and characterise cases in each surveillance hospital for the duration of the  
4 study. The medical officers will be responsible for recruiting participants from different  
5 hospital departments (e.g. rehabilitation, general paediatrics and outpatient clinics) and will  
6 be supervised by the collaborating lead investigators from the surveillance hospitals, who will  
7 verify the type and severity of CP recorded. Data quality and completeness will be checked  
8 regularly by the investigators and senior clinicians at both hospitals. Table 1 shows the  
9 components of the proposed surveillance mechanism to be used by in PAEDS-Vietnam.  
10  
11  
12  
13

### 14 15 **Data collection, quality assurance and analysis plan**

16  
17  
18 Standard data collection forms has been developed in consultation with international experts,  
19 translated into Vietnamese, and modified following review by Vietnamese investigators to  
20 ensure they are appropriate for the local setting. Data will be collected on demographics and  
21 primary health indicators, birth details of the child with CP and maternal pregnancy details,  
22 neurological and motor classifications of CP (i.e. GMFCS), associated impairments, timing  
23 of CP, immunisation, nutrition, education and rehabilitation status. Once the record form has  
24 been completed and checked by a research physician, data will be entered into the PAEDS-  
25 Vietnam electronic data repository. Cases will be de-identified and only the study  
26 investigators and nominated delegates will have access to identifiable data. The PAEDS-  
27 Vietnam secretariat and data coordinating centre will be located at the Hanoi Medical  
28 University, Hanoi, Vietnam. Internal checks for data quality and data entry errors will be  
29 performed routinely in the data coordinating centre. The completeness of ascertainment will  
30 be checked by audit of hospital records and using capture recapture methods. De-identified  
31 data will be shared regularly with the Sydney investigators using a secure portal.  
32  
33  
34  
35  
36  
37  
38  
39  
40  
41

42 Descriptive epidemiological measures, such as rate of hospital presentations and prevalence  
43 of CP will be estimated from the surveillance data. We will use the most recent national  
44 census and demographic and health survey data to calculate the denominator population and  
45 enable comparisons. Frequencies of different types of CP will be presented in percentage  
46 with 95% confidence interval (95% CI).  
47  
48  
49  
50

### 51 **Confidentiality and Privacy**

52  
53  
54 Coded, non-identifiable data will be stored on the PAEDS-Vietnam electronic database. The  
55 dataset will be accessible by the administrator only, with computers protected by a secure  
56 password log-on instigated after five minutes of computer inactivity. No data will be stored  
57  
58  
59  
60

1  
2  
3 on any researcher's personal or hospital computer. Only group data will be presented in  
4 reports or publications and no identifiable information will be made available or apparent  
5 through provision of specific personal or health characteristics. A non-identifiable dataset  
6 will be shared with the lead investigators in Australia for data quality assessment and  
7 advanced statistical analysis.  
8  
9  
10

## 11 12 13 14 **ETHICS AND DISSEMINATION**

### 15 16 17 **Ethics approval**

18  
19 This study was approved by the Hanoi Medical University Institutional Review Board (HMU  
20 IRB decision no. 1722) and the University of Sydney Human Research Ethics Committee  
21 (approval no. 2016/456).  
22  
23  
24

### 25 26 27 **Dissemination**

28 This study will have a number of immediate social and public health benefits: 1) By  
29 identifying children with CP from participating hospitals we will increase clinician  
30 knowledge and skills and facilitate early diagnosis and intervention; 2) This prospective  
31 surveillance will provide unique baseline data on the estimated prevalence and profile of  
32 children with CP and, the aetiology and risk factors for CP in Hanoi, Vietnam; 3) This cohort  
33 could be used as a sampling frame for future research e.g. to intervention trials to evaluate  
34 cost-effective treatment strategies to promote functional abilities and limiting secondary  
35 impairments in children with CP; and 4) PAEDS-Vietnam will establish the feasibility and  
36 utility of a hospital-based, prospective, active disease surveillance mechanism in Vietnam  
37 including its strengths and limitations. Once established, this surveillance could be adapted to  
38 monitor any disease of public health importance and extended to have a nation reach.  
39  
40  
41  
42  
43  
44  
45  
46

### 47 48 49 **List of abbreviations**

50 ACPR: Australian Cerebral Palsy Register, APSU: Australian Paediatric Surveillance Unit,  
51 BCPR: Bangladesh Cerebral Palsy Register; CP: Cerebral Palsy, HREC: Human Research  
52 Ethics Committee, LMIC: Low and Middle Income Countries, NCIRS: National Centre for  
53 Immunisation Research and Surveillance, PAEDS: Paediatric Active Enhanced Disease  
54 Surveillance, SCPE: Surveillance of Cerebral Palsy in Europe  
55  
56  
57  
58  
59  
60

### Competing interests

The authors declare that they have no competing interests.

### Authors' contributions

EE together with GK and NVB conceptualized, designed and established this research study. EE, GK, NVB also contributed to study design and were responsible for the development of the study materials. NVB developed the Vietnamese version of the data collection sheet. EE, GK and NVB were responsible for ethics applications and reporting. NVB, TQD, NTHG, CMC, NTVA, NVY will be responsible for recruitment, data collection and overall conduct of the study in Vietnam. EE, GK, NB, NVB and CMC will be providing specialist advice in this study. EE and GK drafted the manuscript with input from all the co-authors. All authors have agreed the final version of the manuscript and were involved in the decision to submit the manuscript.

All authors read and approved the final manuscript.

### Funding

This study is funded by the Research Foundation of Cerebral Palsy Alliance (PG 6115). GK is supported by NHMRC Health Early Career Fellowship (1054414), EE is supported by an NHMRC Practitioner Fellowship (457084 [MD1]).

### Acknowledgements

We acknowledge the support of study coordinating and implementing partners from NCH and St Paul's hospital.

## REFERENCES

1. Ozmen M, Caliskan M, Apak S, Gokcay G. 8-Year clinical experience in cerebral palsy. *J Tropical Pediatrics* 1993;39; 52-54.
2. Cruz M, Jenkins R, Silberberg D. The burden of brain disorders. *Science* 2006;312(5770):53.
3. Nhà xuất bản Y học. Tài liệu số 10: Phục hồi chức năng cho trẻ bại não. Hà Nội, Việt Nam : Nhà xuất bản Y học 2008; 46 p.
4. CÔNG TY CP TM DV CSSK VĨNH ĐỨC. Phục hồi chức năng trẻ bại não.  
Accessed from: <http://vinhduc.net.vn/kh%C3%A1m-v%C3%A0-%C4%91i%E1%BB%81u-tr%E1%BB%8B-vl-tl-tr%E1%BA%BB-em/6151-ph%E1%BB%A5c-h%E1%BB%93i-ch%E1%BB%A9c-n%C4%83ng-tr%E1%BA%BB-b%E1%BA%A1i-n%C3%A3o>
5. Nguyen TNL, Dang KT. Đánh giá tác dụng phục hồi chức năng vận động của trẻ bại não thể co cứng bằng điện châm, thủy châm kết hợp xoa bóp bấm huyệt.  
<http://123doc.org//document/2268573-danh-gia-tac-dung-phuc-hoi-chuc-nang-van-dong-cua-tre-bai-nao-the-co-cung-bang-dien-cham-thuy-cham-ket-hop-xoa-bop-bam-huyet.htm>
6. VUFO-NGO Resource Centre. 60,000 Vietnamese children suffer from cerebral palsy. Accessed from: <http://www.ngocentre.org.vn/content/60000-vietnamese-children-suffer-cerebral-palsy>
7. Khandaker G, Smithers-Sheedy H, Islam J, Alam M, Jung J, Novak I, Booy R, Jones C, Badawi N, Muhit M. Bangladesh Cerebral Palsy Register (BCPR): a pilot study to develop a national cerebral palsy (CP) register with surveillance of children for CP. *BMC Neurol.* 2015 Sep 25;15:173. doi: 10.1186/s12883-015-0427-9.
8. Centre for Social Assistance for Disadvantaged Children (CSADC). 2011 Annual Report – Vietnam. Ho Chi Minh, Vietnam 2011; Christina Noble Children’s Foundation: 12 p.
9. Zurynski Y, McIntyre P, Booy R, Elliott EJ; PAEDS Investigators Group. Paediatric active enhanced disease surveillance: a new surveillance system for Australia. *J Paediatr Child Health.* 2013 Jul;49(7):588-94. doi: 10.1111/jpc.12282.

- 1  
2  
3 10. Marshall HS, McIntyre P, Richmond P, Buttery JP, Royle JA, Gold MS, Wood N, Elliott  
4 EJ, Zurynski Y, Toi CS, Dwyer DE, Booy R. Changes in patterns of hospitalized children  
5 with varicella and of associated varicella genotypes after introduction of varicella vaccine in  
6 Australia. *Pediatric Infectious Disease Journal* 2013;32:530-7.  
7  
8  
9  
10 11. Elliott EJ, Zurynski YA, Walls T, Whitehead B, Gilmour R, Booy R, Members of  
11 SWINet. Novel inpatient surveillance in tertiary paediatric hospitals in New South Wales  
12 illustrates impact of first-wave pandemic influenza A H1N1 (2009) and informs future health  
13 service planning. *Journal of Paediatrics and Child Health* 2012;48:235-41.  
14  
15  
16  
17 12. Khandaker G, Zurynski Y, Ridley G, Buttery J, Marshall H, Richmond PC, Royle J, Gold  
18 M, Walls T, Whitehead B, McIntyre P, Wood N, Booy R, Elliott EJ. Clinical epidemiology  
19 and predictors of outcome in children hospitalised with influenza A(H1N1)pdm09 in 2009: a  
20 prospective national study. *Influenza and Other Respiratory Viruses* 2014;8:636-45.  
21  
22  
23  
24 13. Surveillance of cerebral palsy in Europe: a collaboration of cerebral palsy surveys and  
25 registers. *Surveillance of Cerebral Palsy in Europe (SCPE)*. *Dev Med Child Neurol*. Dec  
26 2000;42(12):816-824.  
27  
28  
29  
30 14. Australian Cerebral Palsy 10 Register Report 2013. Available from  
31 [http://www.cpresearch.org.au/pdfs/2013\\_ACPR-Report\\_Web.pdf](http://www.cpresearch.org.au/pdfs/2013_ACPR-Report_Web.pdf) accessed on Nov 2014  
32  
33  
34 15. Bax M, Goldstein M, Rosenbaum P, Leviton A, Paneth N, Dan B, Jacobsson B, Damiano  
35 D; Executive Committee for the Definition of Cerebral Palsy. Proposed definition and  
36 classification of cerebral palsy, April 2005. *Dev Med Child Neurol*. 2005 Aug;47(8):571-6.  
37  
38  
39  
40 16. Rosenbaum P., Paneth N., Leviton A., Goldstein M., Bax M. A report: the definition and  
41 classification of cerebral palsy April 2006. *Developmental Medicine and Child Neurology*.  
42 2007;49:8-14.  
43  
44  
45  
46 17. Mutch L, Alberman E, Hagberg B, Kodama K, Perat MV. Cerebral palsy epidemiology:  
47 where are we now and where are we going? *Dev Med Child Neurol*. Jun 1992;34(6):547-551.  
48  
49  
50  
51  
52  
53  
54  
55  
56  
57  
58  
59  
60

**Table 1: Components of PAEDS-Vietnam surveillance methods**

|                          |                                                                             |
|--------------------------|-----------------------------------------------------------------------------|
| Surveillance hospitals   | NCH and St Pauls Hospitals                                                  |
| Surveillance Departments | Rehabilitation, Neurology, General Pediatric outpatient                     |
| Case ascertainment       | Daily review of both inpatient and outpatients list                         |
| Consent and recruitment  | Participating study physicians<br>Defined inclusion/exclusion criteria's    |
| Data quality monitoring  | Named investigators at the participating institutes/departments             |
| Data entry               | Research officers/investigators entering data to Electronic data repository |
| Ongoing monitoring       | Monthly study implementation meeting- all investigators                     |

# BMJ Open

## Protocol for hospital based-surveillance of cerebral palsy (CP) in Hanoi using the Paediatric Active Enhanced Disease Surveillance mechanism (PAEDS-Vietnam): a study towards developing hospital based disease surveillance in Vietnam

|                                 |                                                                                                                                                                                                                                                                                                                                                                                                                                                                                                                                                                                                                                                                                         |
|---------------------------------|-----------------------------------------------------------------------------------------------------------------------------------------------------------------------------------------------------------------------------------------------------------------------------------------------------------------------------------------------------------------------------------------------------------------------------------------------------------------------------------------------------------------------------------------------------------------------------------------------------------------------------------------------------------------------------------------|
| Journal:                        | <i>BMJ Open</i>                                                                                                                                                                                                                                                                                                                                                                                                                                                                                                                                                                                                                                                                         |
| Manuscript ID                   | bmjopen-2017-017742.R1                                                                                                                                                                                                                                                                                                                                                                                                                                                                                                                                                                                                                                                                  |
| Article Type:                   | Protocol                                                                                                                                                                                                                                                                                                                                                                                                                                                                                                                                                                                                                                                                                |
| Date Submitted by the Author:   | 22-Aug-2017                                                                                                                                                                                                                                                                                                                                                                                                                                                                                                                                                                                                                                                                             |
| Complete List of Authors:       | Khandaker, Gulam; National Centre for Immunisation Research and Surveillance of Vaccine Preventable Diseases, Van Bang, Nguyen; Hanoi Medical University, Paediatrics<br>Dũng, Trĩnh ; National Children's Hospital, Rehabilitation<br>Giang, Nguyen ; National Children's Hospital, Rehabilitation<br>Chau, Cao ; Hanoi Medical University, Rehabilitation<br>Van Anh, Nguyen ; Hanoi Medical University, Medical Education and Skills-Lab<br>Van Thuong, Nguyen ; St Paul Hanoi Municipal Hospital, Paediatrics<br>Badawi, Nadia; Children's Hosital at Westmead, Neonatology<br>Elliott, Elizabeth; University of Sydney, Sydney Medical School; Sydney Children's Hospital Network, |
| <b>Primary Subject Heading</b>: | Paediatrics                                                                                                                                                                                                                                                                                                                                                                                                                                                                                                                                                                                                                                                                             |
| Secondary Subject Heading:      | Epidemiology, Public health, Rehabilitation medicine                                                                                                                                                                                                                                                                                                                                                                                                                                                                                                                                                                                                                                    |
| Keywords:                       | Cerebral palsy, Childhood disability, Surveillance, Hanoi, Vietnam                                                                                                                                                                                                                                                                                                                                                                                                                                                                                                                                                                                                                      |
|                                 |                                                                                                                                                                                                                                                                                                                                                                                                                                                                                                                                                                                                                                                                                         |

SCHOLARONE™  
Manuscripts

1  
2  
3 **Protocol for hospital based-surveillance of cerebral palsy (CP) in Hanoi using the**  
4 **Paediatric Active Enhanced Disease Surveillance mechanism (PAEDS-Vietnam): a**  
5 **study towards developing hospital based disease surveillance in Vietnam**  
6  
7  
8

9  
10  
11 **Dr Gulam Khandaker, PhD<sup>†</sup>**  
12

13 The Children's Hospital at Westmead (Clinical School), The University of Sydney, Locked  
14 Bag 4001, Westmead, NSW 2145, Australia  
15

16 Email: [gulam.khandaker@health.nsw.gov.au](mailto:gulam.khandaker@health.nsw.gov.au)  
17

18  
19  
20 **A/Prof Nguyen Van Bang, PhD<sup>†</sup>**  
21

22 Department of Paediatrics, Hanoi Medical University, Hanoi, Vietnam  
23

24 Email: [bsbangbmnhiyhn@gmail.com](mailto:bsbangbmnhiyhn@gmail.com)  
25  
26

27  
28 **Dr Trịnh Quang Dũng, PhD**  
29

30 Head of Rehabilitation Department, National Children's Hospital, Hanoi, Vietnam  
31

32 Email: [quangdzungnip@gmail.com](mailto:quangdzungnip@gmail.com)  
33  
34

35 **Dr Nguyen Thi Huong Giang, PhD**  
36

37 Deputy Head of Rehabilitation Department, National Children's Hospital, Hanoi, Vietnam  
38

39 Email: [hgiang70@gmail.com](mailto:hgiang70@gmail.com)  
40  
41

42 **Prof Cao Minh Chau, PhD**  
43

44 Rehabilitation Department, Hanoi Medical University (Bach Mai hospital), Hanoi, Vietnam  
45

46 Email: [caominhchaubm@yahoo.com](mailto:caominhchaubm@yahoo.com)  
47  
48

49 **Dr Nguyen Thi Van Anh, MD**  
50

51 Medical Education and Skills-Lab Department, Hanoi Medical School, Hanoi, Vietnam  
52

53 Email: [vananh299@gmail.com](mailto:vananh299@gmail.com)  
54  
55  
56  
57  
58  
59  
60

**Dr Nguyen Van Thuong, MD**

Head of Pediatric Dept, Vice-Director of St Paul Hanoi Municipal Hospital, Hanoi, Vietnam

Email: [thuongnhixanhpon@gmail.com](mailto:thuongnhixanhpon@gmail.com)

**Prof Nadia Badawi, PhD**

Cerebral Palsy Alliance Research Institute and the Children's Hospital at Westmead, Australia

Email: [nadia.badawi@health.nsw.gov.au](mailto:nadia.badawi@health.nsw.gov.au)

**Prof Elizabeth Elliott, MD**

Discipline of Paediatrics and Child Health, The Children's Hospital at Westmead Clinical School, Sydney Medical School, The University of Sydney, NSW, Australia

Email: [Elizabeth.elliott@health.nsw.gov.au](mailto:Elizabeth.elliott@health.nsw.gov.au)

†joint first author

**Corresponding author: Dr Gulam Khandaker**

The Children's Hospital at Westmead (Clinical School), The University of Sydney,

Locked Bag 4001, Westmead, NSW 2145, Australia

Email: [gulam.khandaker@health.nsw.gov.au](mailto:gulam.khandaker@health.nsw.gov.au)

T: 61 2 9845 3061

**Abstract for protocol (298 words)**

**Introduction:** The epidemiology, pathogenesis, management and outcomes of cerebral palsy (CP) in low- and middle-income countries (LMIC) including Vietnam are unknown because of the lack of mechanisms for standardised collection of data. In this paper, we outline the protocol for developing a hospital-based surveillance system modelled on the Paediatric Active Enhanced Disease Surveillance system in Australia (PAEDS). Using PAEDS-Vietnam we will define the aetiology, motor function and its severity, associated impairments, nutritional, and rehabilitation status of children with CP in Hanoi, Vietnam. These essential baseline data will inform future health service planning, health professional education and training and family support.

**Methods and Analysis:** This is a hospital-based prospective surveillance of children with CP presenting to the rehabilitation, neurology and general paediatric services at the National Children's Hospital and St Paul's Hospital in Hanoi. We will use active, prospective daily case-finding for all children with CP aged <18 years who are hospitalised or present to outpatients departments. Following parental consent, data will be collected using a modified version of the Australian Cerebral Palsy Register questionnaire. The data collection form has been developed in consultation with local and international experts and translated into Vietnamese. Information collected will include demographics, maternal health and birth history, type and severity of CP, known risk factors for CP and nutrition, immunisation, education and rehabilitation status.

**Ethics and Dissemination:** This study was approved by the Hanoi Medical University Institutional Review Board (HMU IRB decision no. 1722) and the University of Sydney Human Research Ethics Committee (approval no. 2016/456). Establishment of PAEDS-Vietnam will enable hospital-based surveillance of CP for the first time in Vietnam. It will identify preventable causes of CP, patient needs and service gaps and facilitate early diagnosis and intervention. Study findings will be disseminated through local and international conferences and peer reviewed publications.

**Keywords:** Cerebral palsy, Childhood disability, Surveillance, Hanoi, Vietnam

**Word count:** 2514 words, 1 Table and 20 references

## INTRODUCTION

Cerebral Palsy (CP) is the major global cause of childhood disability. Based on data from high income countries it affects up to 17 million people worldwide with a prevalence of approximately 2 per 1,000 live births.<sup>1</sup> The prevalence of CP in low and middle income countries (LMIC) is believed to be four to six times higher however few reliable data are available.<sup>2,3</sup> In Vietnam it is estimated that 500,000 people live with CP and that CP comprises 30-40% of all childhood disability.<sup>4,5</sup>

The prevalence of CP likely varies between provinces in Vietnam. For example, CP prevalence was 0.6 per 1,000 in the general population in Khanh Hoa and 1.5 per 1,000 in the general population in Hatay.<sup>6</sup> These data are limited by methodological quality of studies, including small sample sizes, and likely underestimates of CP prevalence. In one treatment centre in Vietnam an increase in the number of cases with CP has been documented over time. In 1998 at that centre 394 (25.7%) of all children admitted had CP. This increased by more than three times to 912 (47.3%) of all admissions in 2002.<sup>6</sup> In Vietnam, the proportion of children with CP who receive rehabilitation services is estimated at between 30% and 74%, however this cannot be accurately determined without good epidemiological data.<sup>6</sup>

The Vietnamese Ministry of Health has recently recognised service delivery for CP as a public health priority.<sup>4</sup> Furthermore, a recent health reform in Vietnam has established universal health coverage which will provide free-of-charge treatment for children with CP who are aged 6 years or less. Children over 6 years of age who attend school are only covered by voluntary health insurance, requiring guardians to purchase treatment based on their ability to pay.<sup>7</sup> There are no Vietnamese data indicating the age of diagnosis of CP nor the proportion of children who attend mainstream school. In a recent study from Bangladesh we found that the mean age of diagnosis of CP was 4.9 years and only 16% of children with CP attended mainstream school, the remainder having no access to education (preliminary results from the Bangladesh CP Register study).<sup>8</sup>

Reported treatment of CP in Vietnam is commonly a combination of traditional and modern medicine. Traditional medicine includes massage, reflexology, use of electrical stimulation or water magnets and stimulated ventilation with an electric current.<sup>5</sup> An holistic treatment approach, provided following establishment of a centre for social assistance for

1  
2  
3 disadvantaged children. was effective in improving quality of movement through  
4 physiotherapy in 92% of children and providing special/inclusive education.<sup>9</sup>  
5  
6

7 In Vietnam there is an urgent need to understand the burden of CP, patient needs and service  
8 gaps. However there is no disease surveillance, there are no universally accepted treatment  
9 guidelines, and there is no information on the uptake of evidence-based diagnostics or  
10 treatments and policy planning. The lack of rigorous epidemiological data limits capacity to  
11 plan for future disability services.  
12  
13  
14

15  
16 We aim to develop a hospital-based surveillance system modelled on the Paediatric Active  
17 Enhanced Disease Surveillance system operating in Australia (PAEDS). Using PAEDS-  
18 Vietnam we will define the aetiology, motor function, severity, associated impairments, and  
19 nutritional and rehabilitation status of children with CP presenting to two hospitals in Hanoi,  
20 Vietnam. Collection of these essential baseline data will inform future health service  
21 planning, and need for health professional training and family support. Our experience will  
22 establish the feasibility of extending the surveillance system for use in other conditions and  
23 potentially to the national level.  
24  
25  
26  
27  
28  
29

## 30 **METHODS AND ANALYSIS**

### 31 **Aims and Objectives**

32  
33 The overall aim of this study is to i) implement a hospital-based surveillance system to  
34 identify children presenting with CP in Hanoi that is modelled on PAEDS; ii) collect baseline  
35 information on the known risk factors, clinical presentation (motor function/severity,  
36 associated impairments, nutritional and rehabilitation status), service use and needs of  
37 children with CP in Hanoi, Vietnam; and iii) assess the feasibility of a national hospital based  
38 paediatric disease surveillance mechanism for Vietnam.  
39  
40  
41  
42  
43  
44  
45

46 Our specific objectives are to identify and characterise children with CP presenting to the  
47 National Children's Hospital (NCH) and St Paul's Hospitals in Hanoi, Vietnam in order to:  
48  
49

- 50 1. Document the burden of CP in these two hospitals and estimate the prevalence of CP in  
51 Hanoi province  
52
- 53 2. Define the aetiology of CP  
54  
55  
56  
57  
58  
59  
60

3. Document the motor impairment and severity of CP using the Gross Motor Function Classification System (GMFC) and the Manual Ability Classification System (MACS)
4. Describe associated impairments in children with CP
5. Assess the nutritional status of children with CP
6. Assess the rehabilitation status of children with CP
7. Evaluate the strengths and limitations of a hospital based disease surveillance mechanism

### **Overview of study design**

This is a hospital based surveillance study to identify a prospective cohort of children with CP who attend the Rehabilitation, Neurology, and General Paediatric services (inpatient and outpatient) at the NCH and St Paul's Hospital in Hanoi, Vietnam.

### **Description of the participating hospitals**

NCH is a 1,200 bed tertiary paediatric hospital that provides services for nearly 40,000 in-patients and 350,000 out-patients each year from northern Vietnam. St Paul's Hospital is a general medical facility with 150 paediatric beds. Both hospitals are located in central Hanoi, the capital of Vietnam.

### **Surveillance method/activities**

We will establish a method for active, hospital-based surveillance to identify children with CP attending the two hospitals (i.e. PAEDS-Vietnam). This system will be based on the highly successful, government funded Paediatric Active Enhanced Disease Surveillance (PAEDS) System in Australian, established by the Australian Paediatric Surveillance Unit (APSU) in collaboration with the National Centre for Immunisation Research and Surveillance of Vaccine Preventable Diseases (NCIRS) in 2007.<sup>10</sup> PAEDS is currently active in five Australian States and collects data on six conditions (i.e. acute flaccid paralysis, intussusception, varicella and herpes zoster, pertussis, febrile seizures and acute childhood encephalitis). Clinicians are appointed specifically to identify new admissions or presentations with the condition of interest on a daily basis. This is achieved by daily contact with key collaborators (e.g. directors of the rehabilitation ward) and review of hospital intake data (e.g. ward admissions). This process allows for the timely collection of clinical and laboratory data on hospitalised children and has proven invaluable for monitoring selected

1  
2  
3 conditions of national interest (e.g. varicella requiring hospitalisation)<sup>11</sup> and responding to  
4 epidemiological emergencies (e.g. the 2009 influenza pandemic).<sup>12,13</sup>  
5  
6

### 7 **Study participants**

8  
9 All children aged less than 18 years with CP attending as an inpatient or outpatient to one of  
10 the participating hospitals during the study period.  
11  
12

### 13 **Case definition**

14  
15 We have adopted the approach used by Surveillance of Cerebral Palsy in Europe (SCPE) and  
16 the Australian Cerebral Palsy Register (ACPR)<sup>14,15</sup> which allows use of any definition that  
17 includes the following five key elements.<sup>16,17,18</sup>  
18  
19  
20  
21

22 Cerebral palsy:

- 23  
24 (1) is an umbrella term for a group of disorders  
25  
26 (2) is a condition that is permanent but not unchanging  
27  
28 (3) involves a disorder of movement and/or posture and of motor function  
29  
30 (4) is due to a non-progressive interference, lesion, or abnormality, and  
31  
32 (5) the interference, lesion, or abnormality originates in the immature brain.  
33  
34  
35  
36

### 37 **Inclusion/exclusion criteria**

38  
39 A 'case' must fulfil the criteria contained in the five definitional elements above. In children  
40 aged <5 years when a diagnosis of 'CP' is made, the diagnosis must be confirmed when the  
41 child reaches 5 years of age. Most children will be followed clinically in the hospital setting  
42 until therapy is established. Only those children aged less than 5 years will be specifically  
43 followed up by the investigator team to confirm the diagnosis once they are over age 5. If  
44 new information becomes available for a child participating in the study their entry may be  
45 updated, which may involve inclusion or exclusion.<sup>15</sup>  
46  
47  
48  
49  
50

51 Children with intellectual disability of a known cause, neuromuscular disorders, genetic  
52 disorders (e.g. trisomy 21, tuberous sclerosis), a known epilepsy syndrome, progressive  
53 neurodegenerative disorders, brain malignancy or traumatic brain injuries will be excluded  
54 from this study.  
55  
56  
57  
58  
59  
60

## Consent

Written consent for study participation will be obtained by Vietnamese Surveillance Medical Officers (i.e. third party) using participation information and consent forms written in Vietnamese. The treating physician will then complete the data collection form. The Surveillance Medical Officers will not have any role in patients clinical care, thus coercion is unlikely and participation will not influence clinical care.

Children with cerebral palsy aged less than 18 years will be recruited in this study and parental consent alone will be sought for two reasons;

- a. Children with cerebral palsy often have intellectual/cognitive impairment and their ability to give informed consent is variable and uncertain.
- b. Children aged less than 18 years are considered minors in Vietnam, requiring their parents/primary care givers to take full responsibility/authority for any decisions related to their medical care and participation in research.

However, children aged over 14 years and with an appropriate comprehension level will be asked for assent. To consider a child for assent the study investigators will take into account the child's age, maturity, and psychological state to determine whether the child is capable of giving a meaningful assent.

## Case ascertainment

Before commencing surveillance we will provide, and train local clinicians to use, internationally recognised diagnostic guidelines to make the diagnosis of CP.<sup>19</sup> Clinicians at each site will identify eligible children on a daily basis (active case ascertainment). Clinical data relevant to the study protocol will be recorded on a data collection form. We will train medical officers (paediatric doctors or trainees) to identify and characterise cases in each surveillance hospital for the duration of the study. Local study physicians (e.g. general paediatricians, rehabilitation paediatricians, paediatric neurologists) will make the diagnosis of CP or confirm the diagnosis on referred cases. They will be trained in recently published CP diagnostic algorithm.<sup>19</sup>

The medical officers will be responsible for recruiting participants from different hospital departments (e.g. rehabilitation, neurology, general paediatrics and outpatient clinics) and will be supervised by the collaborating lead investigators from the surveillance hospitals, who

1  
2  
3 will verify the type and severity of CP recorded. Clinical data on all cases identified will be  
4 reviewed by the investigator group for potential misdiagnosis. In contentious cases the  
5 opinion of a paediatric neurologist will be sought. Data quality and completeness will be  
6 checked regularly by the investigators and senior clinicians at both hospitals. Table 1 shows  
7 the components of the proposed surveillance mechanism to be used by in PAEDS-Vietnam.  
8  
9

### 10 11 12 **Data collection and quality assurance**

13  
14 Standard data collection forms has been developed (Appendix A) in consultation with  
15 international experts, translated into Vietnamese, and modified following review by  
16 Vietnamese investigators to ensure they are appropriate for the local setting. Data will be  
17 collected on demographics and primary health indicators, birth details of the child with CP  
18 and maternal pregnancy details, neurological and motor classifications of CP (i.e. GMFCS),  
19 associated impairments, timing of CP, immunisation, nutrition, education and rehabilitation  
20 status. Once the record form has been completed and checked by a research physician, data  
21 will be entered into the PAEDS-Vietnam electronic data repository. Cases will be de-  
22 identified and only the study investigators and nominated delegates will have access to  
23 identifiable data. The PAEDS-Vietnam secretariat and data coordinating centre will be  
24 located at the Hanoi Medical University, Hanoi, Vietnam. Internal checks for data quality  
25 and data entry errors will be performed routinely in the data coordinating centre. The  
26 completeness of ascertainment will be checked by audit of hospital records and using capture  
27 recapture methods. De-identified data will be shared regularly with the Sydney investigators  
28 using a secure portal.  
29  
30

### 31 32 33 **Statistical methods**

34  
35 Descriptive epidemiological measures, such as rate of hospital presentations and prevalence  
36 of CP will be estimated from the surveillance data. Frequencies of different types of CP will  
37 be presented as a percentage with 95% confidence interval (95% CI). An estimate of  
38 prevalence of CP in Hanoi province will be calculated per 1000 child population with 95%  
39 CI. We will estimate the prevalence based on the hospital catchment population and  
40 proportion of children with CP attending those hospital for services. This method has  
41 previously been used successfully by our group to estimate the incidence of congenital  
42 rubella syndrome in Hanoi province.<sup>20</sup> We will document the children's address (e.g. district,  
43 province) to enable identification and of children coming from outside the Hanoi region and  
44 their exclusion from estimates of prevalence.  
45  
46  
47  
48  
49  
50  
51  
52  
53  
54  
55  
56  
57  
58  
59  
60

1  
2  
3 We will perform one-sample binomial tests (including t-tests) to compare proportions for  
4 demographic variables in children with CP and the most recent national census and  
5 demographic and health survey data to calculate the denominator population and enable  
6 comparisons. The Statistical Package for Social Sciences (IBM SPSS® 23, Chicago, IL,  
7 USA) will be used for data handling and analysis.  
8  
9  
10

### 11 **Confidentiality and Privacy**

12  
13  
14 Coded, non-identifiable data will be stored on the PAEDS-Vietnam electronic database. The  
15 dataset will be accessible by the administrator only, with computers protected by a secure  
16 password log-on instigated after five minutes of computer inactivity. No data will be stored  
17 on any researcher's personal or hospital computer. Only group data will be presented in  
18 reports or publications and no identifiable information will be made available or apparent  
19 through provision of specific personal or health characteristics. A non-identifiable dataset  
20 will be shared with the lead investigators in Australia for data quality assessment and  
21 advanced statistical analysis.  
22  
23  
24  
25  
26  
27

## 28 **ETHICS AND DISSEMINATION**

### 29 **Ethics approval**

30  
31  
32 This study was approved by the Hanoi Medical University Institutional Review Board (HMU  
33 IRB decision no. 1722) and the University of Sydney Human Research Ethics Committee  
34 (approval no. 2016/456).  
35  
36  
37  
38

### 39 **Study duration**

40  
41  
42 The pilot phase of the study will be for six months. During this period we will train the study  
43 investigators and participating physicians and develop the study implementation tools.  
44 Moreover, during the pilot phase we will gain a better understanding of the case load (i.e.  
45 number of children with CP seeking medical care at participating hospitals). After the pilot  
46 phase we will conduct an interim evaluation of the surveillance mechanism. Once the pilot  
47 phase is successfully implemented surveillance will be continued for another 18 months. The  
48 PAEDS-Vietnam mechanism will remain in place for potential use in other conditions.  
49  
50  
51  
52  
53  
54  
55  
56  
57  
58  
59  
60

### Study limitations

Hospital based surveillance of children with CP will likely overestimate children with severe CP or with co-morbidities such as epilepsy as these children more often require hospitalization. Moreover, we would not be able to precisely estimate the prevalence of CP as it is unlikely that all the children with CP will seek medical care in the participating hospitals.

### Dissemination

This study will have a number of immediate social and public health benefits: 1) By identifying children with CP from participating hospitals we will increase clinician knowledge and skills and facilitate early diagnosis and intervention; 2) This prospective surveillance will provide unique baseline data on the estimated prevalence and profile of children with CP and, the aetiology and risk factors for CP in Hanoi, Vietnam; 3) This cohort could be used as a sampling frame for future research e.g. to intervention trials to evaluate cost-effective treatment strategies to promote functional abilities and limiting secondary impairments in children with CP; and 4) PAEDS-Vietnam will establish the feasibility and utility of a hospital-based, prospective, active disease surveillance mechanism in Vietnam including its strengths and limitations. Once established, this surveillance could be adapted to monitor any disease of public health importance and extended to have a nation reach.

### List of abbreviations

ACPR: Australian Cerebral Palsy Register, APSU: Australian Paediatric Surveillance Unit, BCPR: Bangladesh Cerebral Palsy Register; CP: Cerebral Palsy, HREC: Human Research Ethics Committee, LMIC: Low and Middle Income Countries, NCIRS: National Centre for Immunisation Research and Surveillance, PAEDS: Paediatric Active Enhanced Disease Surveillance, SCPE: Surveillance of Cerebral Palsy in Europe

### Competing interests

The authors declare that they have no competing interests.

### Authors' contributions

EE together with GK and NVB conceptualized, designed and established this research study. EE, GK, NVB also contributed to study design and were responsible for the development of

1  
2  
3 the study materials. NVB developed the Vietnamese version of the data collection sheet. EE,  
4 GK and NVB were responsible for ethics applications and reporting. NVB, TQD, NTHG,  
5 CMC, NTVA, NVY will be responsible for recruitment, data collection and overall conduct  
6 of the study in Vietnam. EE, GK, NB, NVB and CMC will be providing specialist advice in  
7 this study. EE and GK drafted the manuscript with input from all the co-authors. All authors  
8 have agreed the final version of the manuscript and were involved in the decision to submit  
9 the manuscript.  
10  
11  
12  
13

14  
15  
16 All authors read and approved the final manuscript.  
17

### 18 **Funding**

19  
20  
21 This study is funded by the Research Foundation of Cerebral Palsy Alliance (PG 6115). GK  
22 is supported by NHMRC Health Early Career Fellowship (1054414), EE is supported by an  
23 NHMRC Practitioner Fellowship (457084 [MD1]).  
24  
25  
26  
27  
28  
29

### 30 **Acknowledgements**

31  
32  
33 We acknowledge the support of study coordinating and implementing partners from NCH  
34 and St Paul's hospital.  
35  
36  
37  
38  
39  
40  
41  
42  
43  
44  
45  
46  
47  
48  
49  
50  
51  
52  
53  
54  
55  
56  
57  
58  
59  
60

## REFERENCES

1. Ozmen M, Caliskan M, Apak S, Gokcay G. 8-Year clinical experience in cerebral palsy. *J Tropical Pediatrics* 1993;39; 52-54.
2. Cruz M, Jenkins R, Silberberg D. The burden of brain disorders. *Science* 2006;312(5770):53.
3. Donald KA, Samia P, Kakooza-Mwesige A, and Bearden D. Pediatric Cerebral Palsy in Africa: a Systematic Review. *Seminars in Pediatric Neurology*, 2014 Mar;21(1):30-5.
4. Nhà xuất bản Y học. Tài liệu số 10: Phục hồi chức năng cho trẻ bại não. Hà Nội, Việt Nam : Nhà xuất bản Y học 2008; 46 p.
5. CÔNG TY CP TM DV CSSK VĨNH ĐỨC. Phục hồi chức năng trẻ bại não.  
Accessed from: <http://vinhduc.net.vn/kh%C3%A1m-v%C3%A0-%C4%91i%E1%BB%81u-tr%E1%BB%8B-vttl-tr%E1%BA%BB-em/6151-ph%E1%BB%A5c-h%E1%BB%93i-ch%E1%BB%A9c-n%C4%83ng-tr%E1%BA%BB-b%E1%BA%A1i-n%C3%A3o>
6. Nguyen TNL, Dang KT. Đánh giá tác dụng phục hồi chức năng vận động của trẻ bại não thể co cứng bằng điện châm, thủy châm kết hợp xoa bóp bấm huyệt.  
<http://123doc.org//document/2268573-danh-gia-tac-dung-phuc-hoi-chuc-nang-van-dong-cua-tre-bai-nao-the-co-cung-bang-dien-cham-thuy-cham-ket-hop-xoa-bop-bam-huyet.htm>
7. VUFO-NGO Resource Centre. 60,000 Vietnamese children suffer from cerebral palsy. Accessed from: <http://www.ngocentre.org.vn/content/60000-vietnamese-children-suffer-cerebral-palsy>
8. Khandaker G, Smithers-Sheedy H, Islam J, Alam M, Jung J, Novak I, Booy R, Jones C, Badawi N, Muhit M. Bangladesh Cerebral Palsy Register (BCPR): a pilot study to develop a national cerebral palsy (CP) register with surveillance of children for CP. *BMC Neurol*. 2015 Sep 25;15:173. doi: 10.1186/s12883-015-0427-9.
9. Centre for Social Assistance for Disadvantaged Children (CSADC). 2011 Annual Report – Vietnam. Ho Chi Minh, Vietnam 2011; Christina Noble Children’s Foundation: 12 p.

- 1  
2  
3 10. Zurynski Y, McIntyre P, Booy R, Elliott EJ; PAEDS Investigators Group. Paediatric  
4 active enhanced disease surveillance: a new surveillance system for Australia. *J Paediatr*  
5 *Child Health*. 2013 Jul;49(7):588-94. doi: 10.1111/jpc.12282.  
6  
7  
8  
9 11. Marshall HS, McIntyre P, Richmond P, BATTERY JP, Royle JA, Gold MS, Wood N, Elliott  
10 EJ, Zurynski Y, Toi CS, Dwyer DE, Booy R. Changes in patterns of hospitalized children  
11 with varicella and of associated varicella genotypes after introduction of varicella vaccine in  
12 Australia. *Pediatric Infectious Disease Journal* 2013;32:530-7.  
13  
14  
15 12. Elliott EJ, Zurynski YA, Walls T, Whitehead B, Gilmour R, Booy R, Members of  
16 SWINet. Novel inpatient surveillance in tertiary paediatric hospitals in New South Wales  
17 illustrates impact of first-wave pandemic influenza A H1N1 (2009) and informs future health  
18 service planning. *Journal of Paediatrics and Child Health* 2012;48:235-41.  
19  
20  
21 13. Khandaker G, Zurynski Y, Ridley G, BATTERY J, Marshall H, Richmond PC, Royle J, Gold  
22 M, Walls T, Whitehead B, McIntyre P, Wood N, Booy R, Elliott EJ. Clinical epidemiology  
23 and predictors of outcome in children hospitalised with influenza A(H1N1)pdm09 in 2009: a  
24 prospective national study. *Influenza and Other Respiratory Viruses* 2014;8:636-45.  
25  
26  
27 14. Surveillance of cerebral palsy in Europe: a collaboration of cerebral palsy surveys and  
28 registers. *Surveillance of Cerebral Palsy in Europe (SCPE)*. *Dev Med Child Neurol*. Dec  
29 2000;42(12):816-824.  
30  
31 15. Australian Cerebral Palsy 10 Register Report 2013. Available from  
32 [http://www.cpresearch.org.au/pdfs/2013\\_ACPR-Report\\_Web.pdf](http://www.cpresearch.org.au/pdfs/2013_ACPR-Report_Web.pdf) accessed on Nov 2014  
33  
34  
35 16. Bax M, Goldstein M, Rosenbaum P, Leviton A, Paneth N, Dan B, Jacobsson B, Damiano  
36 D; Executive Committee for the Definition of Cerebral Palsy. Proposed definition and  
37 classification of cerebral palsy, April 2005. *Dev Med Child Neurol*. 2005 Aug;47(8):571-6.  
38  
39  
40 17. Rosenbaum P., Paneth N., Leviton A., Goldstein M., Bax M. A report: the definition and  
41 classification of cerebral palsy April 2006. *Developmental Medicine and Child Neurology*.  
42 2007;49:8-14.  
43  
44  
45 18. Mutch L, Alberman E, Hagberg B, Kodama K, Perat MV. Cerebral palsy epidemiology:  
46 where are we now and where are we going? *Dev Med Child Neurol*. Jun 1992;34(6):547-551.  
47  
48  
49  
50  
51  
52  
53  
54  
55  
56  
57  
58  
59  
60

1  
2  
3 19. Novak I, Morgan C, Adde L. et al. Early, Accurate Diagnosis and Early Intervention in  
4 Cerebral Palsy: Advances in Diagnosis and Treatment. JAMA Pediatr. 2017 Jul 17.  
5  
6

7 20. Van Bang N, Van Anh NT, Van VT, Thai TT, Van Thuong N, Khandaker G, Elliott E.  
8 Surveillance of congenital rubella syndrome (CRS) in tertiary care hospitals in Hanoi,  
9 Vietnam during a rubella epidemic. Vaccine. 2014 Dec 12;32(52):7065-9.  
10  
11  
12  
13  
14  
15  
16  
17  
18  
19  
20  
21  
22  
23  
24  
25  
26  
27  
28  
29  
30  
31  
32  
33  
34  
35  
36  
37  
38  
39  
40  
41  
42  
43  
44  
45  
46  
47  
48  
49  
50  
51  
52  
53  
54  
55  
56  
57  
58  
59  
60

For peer review only

**Table 1: Components of PAEDS-Vietnam surveillance methods**

|                          |                                                                             |
|--------------------------|-----------------------------------------------------------------------------|
| Surveillance hospitals   | NCH and St Pauls Hospitals                                                  |
| Surveillance Departments | Rehabilitation, Neurology, General Pediatric outpatient                     |
| Case ascertainment       | Daily review of both inpatient and outpatients list                         |
| Consent and recruitment  | Participating study physicians<br>Defined inclusion/exclusion criteria's    |
| Data quality monitoring  | Named investigators at the participating institutes/departments             |
| Data entry               | Research officers/investigators entering data to Electronic data repository |
| Ongoing monitoring       | Monthly study implementation meeting- all investigators                     |

# HOSPITAL BASED SURVEILLANCE OF CP IN HANOI, Vietnam

## FOR PERSON WITH CEREBRAL PALSY (CP)

### Contact details (person with CP)

First name  Middle Name  Surname

Gender:  Male  Female DOB (DD/MM/YYYY)  /  /

Ethnic Group:  Vietnamese  Tay  Thai  Chinese  Khmer  Muong  Nung  Hre  Phu  E de  Dao  Co tu  
 Cham  Other, please specify.....

#### Address

House No:  Street name:   
 Sub-district:  District:  Province:   
 Postcode:  Email:  Telephone/Mobile No:

### Demographics and primary health indicators (person/family of person with CP)

Type of accommodation flooring:  Finished floor  Rough wood/bamboo  Earth, sand  
 Number of household member: ..... Persons; Number of rooms in the household: ..... Rooms  
 Source of Drinking Water:  Piped water  Well water  Other sources (ponds, river, stream, lake)  
 Sanitation:  Flush toilet  Pit toilet  No facility, bush  
 Monthly family income of the child with CP (in Vietnamese Dong) ..... Dong

Please complete this section if individual with CP is under 18, or older than 18 but unable to give consent.

First name  Surname  Type of relationship

#### Address

House No:  Street name:   
 Sub-district:  District:   
 Province:  Postcode:  Email:   
 Telephone/Mobile No:

### Health Professionals details

Name

Type (e.g. Medical practitioner, Physiotherapist, Occupational therapist)

Phone/Mobile  Place of work

Address

Email

HOSPITAL BASED SURVEILLANCE OF CP IN HANOI, Vietnam

FOR PERSON WITH CEREBRAL PALSY (CP)

Birth details of person with CP and maternal pregnancy details

Birth place  Hospital  Health Care Centre  birth centre  home birth  Other/Specify.....

If home birth,  Unplanned  Planned, Delivery attended by  Skilled birth attendant/TBA  Other family members  Doctor/Midwife

Birth weight (in gram)  or  Unknown Born at  weeks gestation

Was there any sign of birth asphyxia (e.g. very weak breathing/cry, cyanosis, bradycardia, poor muscle tone/reflexes, meconium strained liquor, seizure - circle which applies):  No  Yes  Don't Know

Did the child show any early feeding difficulties (first month of life) manifesting as poor sucking abilities?  
 No  Yes  Don't Know

Mode of delivery  Spontaneous vaginal delivery  Instrumental delivery  Caesarean section

Any complications during child birth/labour  No  Yes

If yes specify (please tick)  Obstructed/prolonged labour (active phase of labour >12 hours)  Malpresentation  
 Pre-eclampsia/Eclampsia  Haemorrhage  Premature rupture of membranes/premature labour (<37 weeks)  Other complications,

If other please specify

Did the mother experience any febrile illness during pregnancy  No  Yes  Don't Know

If yes, was it associated with rash?  No  Yes  Don't Know

If yes, please specify when did the rash appear?  1-12 weeks  13-28 weeks  29-40 weeks  Don't Know

Did the mother experience any febrile illness during labour/child birth?  No  Yes  Don't Know

Did the mother receive any antenatal care during pregnancy?  Yes  No

If Yes,  Regular  Irregular (but >2 visits)  Irregular (<2 visits)

Did the mother receive any nutritional supplementation during pregnancy (e.g. Iron/Folic acid)  Yes  No  Don't Know

[If multiple hospital transfer, specify highest level]  
 Hospital of neonatal transfer (if applicable)  District of hospital

Received more than routine care?  Yes – NICU  Yes - special care  No - routine care only  
 [e.g. intubation & ventilation] [e.g. Phototherapy, NG feeding] [e.g. Observation]

If Yes, total length of stay  days

Was MRI completed?  Yes  No Which hospital?

Was this a multiple birth?  Yes  No If Yes,  Twins  Triplets  4  5  6  >6

Birth order of child with CP in the family (e.g. 2<sup>nd</sup>)

Was there any assistance with conception? (please tick)  
 No  Yes, type unknown  Yes, if known please circle which type of assistance: fertility drugs only, ovulation stimulation only, artificial insemination, ICSI, IVF, GIFT. Other

Number of previous live births to mother  Number of previous stillbirths (> 20 weeks gestation) to mother

Number of previous miscarriages (< 20 weeks gestation) to mother

## HOSPITAL BASED SURVEILLANCE OF CP IN HANOI, Vietnam

## FOR PERSON WITH CEREBRAL PALSY (CP)

## Birth parent details

## Mother

First name  Middle Name  Surname

DOB (DD/MM/YYYY)  /  /  Mother's educational level at time of child's birth:  Illiterate

Primary  Secondary  Higher secondary  Graduation  Post graduation  Diploma/other trade qualification

Mothers occupation at time of child's birth

## Father

First name  Middle Name  Surname

DOB (DD/MM/YYYY)  /  /  Father's educational level at time of child's birth:  Illiterate

Primary  Secondary  Higher secondary  Graduation  Post graduation  Diploma/other trade qualification

Father's occupation at time of child's birth

Are the parents related (blood related, i.e. first cousin)  Yes  No

Is there any other family member with disability?  Yes  No

If yes, how the other disabled family members related to the child with CP?  Sibling  Parent  Both

Please specify the disability/impairment of the other family member (s)

Clinical details of child with CP (If you are unsure about any question, please leave blank)

Age at which CP was first formally diagnosed Years  Months

| Type of cerebral palsy (please tick) | Main type at initial diagnosis (<5 years) | Main type at or over age 5 | Secondary type at or over age 5 |
|--------------------------------------|-------------------------------------------|----------------------------|---------------------------------|
| <b>Spasticity</b>                    |                                           |                            |                                 |
| Left hemiplegia / monoplegia         | <input type="checkbox"/>                  | <input type="checkbox"/>   | <input type="checkbox"/>        |
| Right hemiplegia / monoplegia        | <input type="checkbox"/>                  | <input type="checkbox"/>   | <input type="checkbox"/>        |
| Diplegia                             | <input type="checkbox"/>                  | <input type="checkbox"/>   | <input type="checkbox"/>        |
| Triplegia                            | <input type="checkbox"/>                  | <input type="checkbox"/>   | <input type="checkbox"/>        |
| Quadriplegia                         | <input type="checkbox"/>                  | <input type="checkbox"/>   | <input type="checkbox"/>        |
| <b>Dyskinesia</b>                    |                                           |                            |                                 |
| Mainly athetosis                     | <input type="checkbox"/>                  | <input type="checkbox"/>   | <input type="checkbox"/>        |
| Mainly dystonia                      | <input type="checkbox"/>                  | <input type="checkbox"/>   | <input type="checkbox"/>        |
| Ataxia                               | <input type="checkbox"/>                  | <input type="checkbox"/>   | <input type="checkbox"/>        |
| Hypotonia                            | <input type="checkbox"/>                  | <input type="checkbox"/>   | <input type="checkbox"/>        |
| Resolved by age 5                    | <input type="checkbox"/>                  | <input type="checkbox"/>   | <input type="checkbox"/>        |
| Known syndrome - not CP              | <input type="checkbox"/>                  | <input type="checkbox"/>   | <input type="checkbox"/>        |
| Unknown syndrome - not CP            | <input type="checkbox"/>                  | <input type="checkbox"/>   | <input type="checkbox"/>        |
| Unknown                              | <input type="checkbox"/>                  | <input type="checkbox"/>   | <input type="checkbox"/>        |

HOSPITAL BASED SURVEILLANCE OF CP IN HANOI, Vietnam

FOR PERSON WITH CEREBRAL PALSY (CP)

|                                                                                                            |                                       |                          |
|------------------------------------------------------------------------------------------------------------|---------------------------------------|--------------------------|
| <b>Severity of cerebral palsy</b><br>(please tick one)<br>(please see GMFCS sheet for further information) | <b>Main type at initial diagnosis</b> | <b>at or over age 5</b>  |
| GMFCS level I                                                                                              | <input type="checkbox"/>              | <input type="checkbox"/> |
| GMFCS level II                                                                                             | <input type="checkbox"/>              | <input type="checkbox"/> |
| GMFCS level III                                                                                            | <input type="checkbox"/>              | <input type="checkbox"/> |
| GMFCS level IV                                                                                             | <input type="checkbox"/>              | <input type="checkbox"/> |
| GMFCS level V                                                                                              | <input type="checkbox"/>              | <input type="checkbox"/> |
| Comment (e.g. any difficulty in assessing the GMFCS level)                                                 |                                       |                          |
|                                                                                                            |                                       |                          |

|                                                                                                                               |                                                          |
|-------------------------------------------------------------------------------------------------------------------------------|----------------------------------------------------------|
| <b>Ability to handle objects in daily life</b><br>(please tick one)<br>(please see MACS sheet for further information)        | <b>At or over age 4</b>                                  |
| MACS level I                                                                                                                  | <input type="checkbox"/>                                 |
| MACS level II                                                                                                                 | <input type="checkbox"/>                                 |
| MACS level III                                                                                                                | <input type="checkbox"/>                                 |
| MACS level IV                                                                                                                 | <input type="checkbox"/>                                 |
| MACS level V                                                                                                                  | <input type="checkbox"/>                                 |
| Were any birth defects present? (e.g. congenital heart defect)                                                                | <input type="checkbox"/> No <input type="checkbox"/> Yes |
| If yes, please give details <span style="border: 1px solid black; display: inline-block; width: 700px; height: 15px;"></span> |                                                          |
| Is there a known syndrome?                                                                                                    | <input type="checkbox"/> No <input type="checkbox"/> Yes |
| If yes, please give details <span style="border: 1px solid black; display: inline-block; width: 700px; height: 15px;"></span> |                                                          |

**Presence of associated impairments (please tick one for each section)**

|              |                                                                                                                                                |                                                                                                                                           |
|--------------|------------------------------------------------------------------------------------------------------------------------------------------------|-------------------------------------------------------------------------------------------------------------------------------------------|
| Epilepsy     | <input type="checkbox"/> Yes<br><input type="checkbox"/> Resolved by age 5                                                                     | <input type="checkbox"/> No<br><input type="checkbox"/> Unknown                                                                           |
| Intellectual | <input type="checkbox"/> No impairment<br><input type="checkbox"/> Probably no impairment<br><input type="checkbox"/> Probably some impairment | <input type="checkbox"/> Mild<br><input type="checkbox"/> Moderate<br><input type="checkbox"/> Severe<br><input type="checkbox"/> Unknown |
| Visual       | <input type="checkbox"/> No impairment<br><input type="checkbox"/> Some impairment (e.g. glasses)                                              | <input type="checkbox"/> Functionally blind<br><input type="checkbox"/> Unknown                                                           |
|              | <b>Strabismus</b> <input type="checkbox"/> No <input type="checkbox"/> Yes                                                                     | <input type="checkbox"/> Unknown                                                                                                          |
| Hearing      | <input type="checkbox"/> No Impairment<br><input type="checkbox"/> Some impairment (includes conductive hearing loss)                          | <input type="checkbox"/> Bilateral deafness<br><input type="checkbox"/> Unknown                                                           |
| Speech       | <input type="checkbox"/> No impairment<br><input type="checkbox"/> Some impairment                                                             | <input type="checkbox"/> Non verbal<br><input type="checkbox"/> Unknown                                                                   |

## HOSPITAL BASED SURVEILLANCE OF CP IN HANOI, Vietnam

## FOR PERSON WITH CEREBRAL PALSY (CP)

Timing of cerebral palsy?

 Unknown During pregnancy and up to first 28 days of life (pre & perinatal) After first 28 days of life (postnatal)

Was there a confirmed cause of cerebral palsy?

 Unknown In utero cytomegalovirus Other infection (toxoplasmosis, rubella, herpes simplex virus) Other infection (please list in comments) Other (please list in comments)**Head injury** Motor vehicle accident Non accidental Fall Other (please describe in comments)**Infection** Unspecified cause Viral Bacterial Dehydration due to gastroenteritis**Stroke or CVA** During or following surgical procedure Spontaneous Associated with other cardiac complications**Other** Post seizure Near sudden infant death syndrome (SIDS) Post immunisation Near drowning Peri-operative hypoxia Apparent life-threatening event Other (please describe in comments)

Comments

**Immunisation history**

Is the child fully immunised?

 Yes No Don't know1. BCG and HepB vaccine after Birth  2. DPT-HepB-Hib and OPV at 2 months  4 months  and 6 months 3. Measles vaccine 9 months  4. Measles and Rubella vaccine 18 months  5. Japanese encephalitis vaccine 12 months ; + 2 weeks ; 2 years 

If No, reason why the child missed immunisation?

 Not aware  No money  Transport problem  Others, please specify

Is there any BCG vaccine mark?

 Yes No

If the child is 9 months to 15 years old, did the child receive

Measles-Rubella (MR) vaccine on 2015 National MR

 Yes Nocampaign [ N/A]

HOSPITAL BASED SURVEILLANCE OF CP IN HANOI, Vietnam

FOR PERSON WITH CEREBRAL PALSY (CP)

**Nutrition**

Current weight of the child  in Kg

Mid arm circumference of the child  in cm Head circumference of the child  in cm

Height of the child  in cm [knee height in cm .....]  
 (those with deformities, estimate height using the knee height equation, Height = (2.69 x knee height) + 24.2)

**Education**

Is the Child Currently attending mainstream school?  Yes  No  Not applicable

Type of School if the child is attending a school  Primary  secondary  Vocational/Other

Is the child currently attending any special school?  Yes  No

If not attending any school (6+ years) reason why?  Working  School too far  Disability not accepted by school  Lack of money

Parents refused  Other reason, specify

**Rehabilitation**

Has the child ever received any rehabilitation service or other related support  Yes  No

What type of support was received?

Assistive/adaptive device  Surgery  Therapy exercises  Advice  Other, Specify

If Assistive/adaptive device is ticked, please specify which applies;

Wheelchairs  Standing/walking aids (walker/frame)  Strollers  Orthotics (AFO/KFO)  Specialised seating (corner chair)  Mealtime Aids  Communication Aids, Other , Please specify.....

What was the type of location for accessing these rehabilitation services?

Home based  NGO centre  Hospital  Private clinic

Age at when the child first received any rehabilitative services  (in years)

Reason why child NEVER received rehabilitation?

Not aware  No money  Transport problem  Others, please specify

**General health**

Number of hospitalizations for chest infections/respiratory infections in the past 6 months: ..... times

Does the child have any swallowing difficulty?  Yes  No  Unknown

Does the child have reflux (gastro-oesophageal reflux disease – GORD)?  Yes  No  Unknown

The above information has been collected by  on

who is a (please tick)  Medical practitioner  Physiotherapist  Occupational therapist  Speech pathologist
