# Supplementary material for: Protocol for hospital based-surveillance of cerebral palsy (CP) in Hanoi using the Paediatric Active Enhanced Disease Surveillance mechanism (PAEDS-Vietnam): a study towards developing hospital-based disease surveillance in Vietnam
Source: PubMed Central journal article supplement — BMJ Open. 2017 Nov 9;7(11):e017742. doi: 10.1136/bmjopen-2017-017742 (PMC5695473; doi:10.1136/bmjopen-2017-017742), 2017-11-09
Supplement: bmjopen-2017-017742supp001.pdf [file bmjopen-2017-017742supp001.pdf]

# HOSPITAL BASED SURVEILLANCE OF CP IN HANOI, Vietnam

## FOR PERSON WITH CEREBRAL PALSY (CP)

### Contact details (person with CP)

First name  Middle Name  Surname

Gender:  Male  Female

DOB (DD/MM/YYYY)  \_\_\_ / \_\_\_ / \_\_\_\_\_

Ethnic Group:  Vietnamese  Tay  Thai  Chinese  Khmer  Muong  Nung  Hre  Phu  E de  Dao  Co tu  
 Cham  Other, please specify.....

#### Address

|               |              |                      |
|---------------|--------------|----------------------|
| House No:     | Street name: |                      |
| Sub-district: | District:    | Province:            |
| Postcode:     | Email:       | Telephone/Mobile No: |

### Demographics and primary health indicators (person/family of person with CP)

Type of accommodation flooring:  Finished floor  Rough wood/bamboo  Earth, sand

Number of household member: ..... Persons; Number of rooms in the household: ..... Rooms

Source of Drinking Water:  Piped water  Well water  Other sources (ponds, river, stream, lake)

Sanitation:  Flush toilet  Pit toilet  No facility, bush

Monthly family income of the child with CP (in Vietnamese Dong) ..... Dong

Please complete this section if individual with CP is under 18, or older than 18 but unable to give consent.

First name  Surname  Type of relationship

#### Address

|                      |              |        |
|----------------------|--------------|--------|
| House No:            | Street name: |        |
| Sub-district:        | District:    |        |
| Province:            | Postcode:    | Email: |
| Telephone/Mobile No: |              |        |

### Health Professionals details

Name

Type (e.g. Medical practitioner, Physiotherapist, Occupational therapist)

Phone/Mobile  Place of work

Address

Email

## FOR PERSON WITH CEREBRAL PALSY (CP)

### Birth details of person with CP and maternal pregnancy details

Birth place  Hospital  Health Care Centre  birth centre  home birth  Other/Specify.....

If home birth,  Unplanned  Planned, Delivery attended by  Skilled birth attendant/TBA  Other family members  Doctor/Midwife

Birth weight (in gram)  or  Unknown Born at  weeks gestation

Was there any sign of birth asphyxia (e.g. very weak breathing/cry, cyanosis, bradycardia, poor muscle tone/reflexes, meconium strained liquor, seizure - circle which applies):  No  Yes  Don't Know

Did the child show any early feeding difficulties (first month of life) manifesting as poor sucking abilities?  
 No  Yes  Don't Know

Mode of delivery  Spontaneous vaginal delivery  Instrumental delivery  Caesarean section

Any complications during child birth/labour  No  Yes

If yes specify (please tick)  Obstructed/prolonged labour (active phase of labour >12 hours)  Malpresentation  
 Pre-eclampsia/Eclampsia  Haemorrhage  Premature rupture of membranes/premature labour (<37 weeks)  Other complications,

If other please specify

Did the mother experience any febrile illness during pregnancy  No  Yes  Don't Know

If yes, was it associated with rash?  No  Yes  Don't Know

If yes, please specify when did the rash appear?  1-12 weeks  13-28 weeks  29-40 weeks  Don't Know

Did the mother experience any febrile illness during labour/child birth?  No  Yes  Don't Know

Did the mother receive any antenatal care during pregnancy?  Yes  No

If Yes,  Regular  Irregular (but >2 visits)  Irregular (<2 visits)

Did the mother receive any nutritional supplementation during pregnancy (e.g. Iron/Folic acid)  Yes  No  Don't Know

[If multiple hospital transfer, specify highest level]  
Hospital of neonatal transfer (if applicable)  District of hospital

Received more than routine care?  Yes – NICU  Yes - special care  No - routine care only  
[e.g. intubation & ventilation] [e.g. Phototherapy, NG feeding] [e.g. Observation]

If Yes, total length of stay  days

Was MRI completed?  Yes  No Which hospital?

Was this a multiple birth?  Yes  No If Yes,  Twins  Triplets  4  5  6  >6

Birth order of child with CP in the family (e.g. 2<sup>nd</sup>)

Was there any assistance with conception? (please tick)  
 No  Yes, type unknown  Yes, if known please circle which type of assistance: fertility drugs only, ovulation stimulation only, artificial insemination, ICSI, IVF, GIFT. Other

Number of previous live births to mother  Number of previous stillbirths (> 20 weeks gestation) to mother

Number of previous miscarriages (< 20 weeks gestation) to mother

## FOR PERSON WITH CEREBRAL PALSY (CP)

### Birth parent details

#### Mother

First name  Middle Name  Surname

DOB (DD/MM/YYYY)  /  /  Mother's educational level at time of child's birth:  Illiterate

Primary  Secondary  Higher secondary  Graduation  Post graduation  Diploma/other trade qualification

Mothers occupation at time of child's birth

#### Father

First name  Middle Name  Surname

DOB (DD/MM/YYYY)  /  /  Father's educational level at time of child's birth:  Illiterate

Primary  Secondary  Higher secondary  Graduation  Post graduation  Diploma/other trade qualification

Father's occupation at time of child's birth

Are the parents related (blood related, i.e. first cousin)  Yes  No

Is there any other family member with disability?  Yes  No

If yes, how the other disabled family members related to the child with CP?  Sibling  Parent  Both

Please specify the disability/impairment of the other family member (s)

### Clinical details of child with CP (If you are unsure about any question, please leave blank)

Age at which CP was first formally diagnosed Years  Months

| Type of cerebral palsy (please tick) | Main type at initial diagnosis (<5 years) | Main type at or over age 5 | Secondary type at or over age 5 |
|--------------------------------------|-------------------------------------------|----------------------------|---------------------------------|
| <b>Spasticity</b>                    |                                           |                            |                                 |
| Left hemiplegia / monoplegia         | <input type="checkbox"/>                  | <input type="checkbox"/>   | <input type="checkbox"/>        |
| Right hemiplegia / monoplegia        | <input type="checkbox"/>                  | <input type="checkbox"/>   | <input type="checkbox"/>        |
| Diplegia                             | <input type="checkbox"/>                  | <input type="checkbox"/>   | <input type="checkbox"/>        |
| Triplegia                            | <input type="checkbox"/>                  | <input type="checkbox"/>   | <input type="checkbox"/>        |
| Quadriplegia                         | <input type="checkbox"/>                  | <input type="checkbox"/>   | <input type="checkbox"/>        |
| <b>Dyskinesia</b>                    |                                           |                            |                                 |
| Mainly athetosis                     | <input type="checkbox"/>                  | <input type="checkbox"/>   | <input type="checkbox"/>        |
| Mainly dystonia                      | <input type="checkbox"/>                  | <input type="checkbox"/>   | <input type="checkbox"/>        |
| Ataxia                               | <input type="checkbox"/>                  | <input type="checkbox"/>   | <input type="checkbox"/>        |
| Hypotonia                            | <input type="checkbox"/>                  | <input type="checkbox"/>   | <input type="checkbox"/>        |
| Resolved by age 5                    | <input type="checkbox"/>                  | <input type="checkbox"/>   | <input type="checkbox"/>        |
| Known syndrome - not CP              | <input type="checkbox"/>                  | <input type="checkbox"/>   | <input type="checkbox"/>        |
| Unknown syndrome - not CP            | <input type="checkbox"/>                  | <input type="checkbox"/>   | <input type="checkbox"/>        |
| Unknown                              | <input type="checkbox"/>                  | <input type="checkbox"/>   | <input type="checkbox"/>        |

## FOR PERSON WITH CEREBRAL PALSY (CP)

### Severity of cerebral palsy

(please tick one)

(please see GMFCS sheet for further information)

GMFCS level I



GMFCS level II



GMFCS level III



GMFCS level IV



GMFCS level V



Comment (e.g. any difficulty in assessing the GMFCS level)

### Ability to handle objects in daily life

(please tick one)

(please see MACS sheet for further information)

MACS level I

MACS level II

MACS level III

MACS level IV

MACS level V

Were any birth defects present? (e.g. congenital heart defect)

 No

 Yes

If yes, please give details

Is there a known syndrome?

 No

 Yes

If yes, please give details

### Presence of associated impairments (please tick one for each section)

Epilepsy

 Yes

 No

 Resolved by age 5

 Unknown

Intellectual

 No impairment

 Mild

 Probably no impairment

 Moderate

 Probably some impairment

 Severe

 Unknown

Visual

 No impairment

 Functionally blind

 Some impairment (e.g. glasses)

 Unknown

Strabismus

 No

 Yes

 Unknown

Hearing

 No Impairment

 Bilateral deafness

 Some impairment (includes conductive hearing loss)

 Unknown

Speech

 No impairment

 Non verbal

 Some impairment

 Unknown

FOR PERSON WITH CEREBRAL PALSY (CP)

Timing of cerebral palsy?

- Unknown   
  During pregnancy and up to first 28 days of life (pre & perinatal)   
  After first 28 days of life (postnatal)

Was there a confirmed cause of cerebral palsy?

- Unknown  
 In utero cytomegalovirus  
 Other infection (toxoplasmosis, rubella, herpes simplex virus)  
 Other infection (please list in comments)  
 Other (please list in comments)
- Head injury**
- Motor vehicle accident  
 Non accidental  
 Fall  
 Other (please describe in comments)
- Infection**
- Unspecified cause  
 Viral  
 Bacterial  
 Dehydration due to gastroenteritis
- Stroke or CVA**
- During or following surgical procedure  
 Spontaneous  
 Associated with other cardiac complications
- Other**
- Post seizure  
 Near sudden infant death syndrome (SIDS)  
 Post immunisation  
 Near drowning  
 Peri-operative hypoxia  
 Apparent life-threatening event  
 Other (please describe in comments)

Comments

**Immunisation history**

Is the child fully immunised?     Yes     No     Don't know

1. BCG and HepB vaccine after Birth    
 2. DPT-HepB-Hib and OPV at 2 months    
 4 months  and   
 6 months   
 3. Measles vaccine 9 months    
 4. Measles and Rubella vaccine 18 months    
 5. Japanese encephalitis vaccine 12 months ; + 2 weeks ; 2 years

If No, reason why the child missed immunisation?

- Not aware   
  No money   
  Transport problem   
  Others, please specify

Is there any BCG vaccine mark?     Yes     No

If the child is 9 months to 15 years old, did the child receive Measles-Rubella (MR) vaccine on 2015 National MR campaign [ N/A]     Yes     No

## FOR PERSON WITH CEREBRAL PALSY (CP)

### Nutrition

Current weight of the child  in Kg

Mid arm circumference of the child  in cm Head circumference of the child  in cm

Height of the child  in cm [knee height in cm .....]  
*(those with deformities, estimate height using the knee height equation, Height = (2.69 x knee height) + 24.2)*

### Education

Is the Child Currently attending mainstream school?  Yes  No  Not applicable

Type of School if the child is attending a school  Primary  secondary  Vocational/Other

Is the child currently attending any special school?  Yes  No

If not attending any school (6+ years) reason why?  Working  School too far  Disability not accepted by school  Lack of money

Parents refused  Other reason, specify

### Rehabilitation

Has the child ever received any rehabilitation service or other related support  Yes  No

What type of support was received?  Assistive/adaptive device  Surgery  Therapy exercises  Advice  Other, Specify

If Assistive/adaptive device is ticked, please specify which applies;  
 Wheelchairs  Standing/walking aids (walker/frame)  Strollers  Orthotics (AFO/KFO)  Specialised seating (corner chair)  Mealtime Aids  Communication Aids, Other , Please specify.....

What was the type of location for accessing these rehabilitation services?  
 Home based  NGO centre  Hospital  Private clinic

Age at when the child first received any rehabilitative services  (in years)

Reason why child NEVER received rehabilitation?  
 Not aware  No money  Transport problem  Others, please specify

### General health

Number of hospitalizations for chest infections/respiratory infections in the past 6 months: ..... times

Does the child have any swallowing difficulty?  Yes  No  Unknown

Does the child have reflux (gastro-oesophageal reflux disease – GORD)?  Yes  No  Unknown

The above information has been collected by  on

who is a (please tick)  Medical practitioner  Physiotherapist  Occupational therapist  Speech pathologist
